# Supplementary material for: Disentangling Sub-Millisecond Processes within an Auditory Transduction Chain
Source: PubMed Central journal article supplement (PMC539322; doi:10.1371/journal.pbio.0030008), 2005-01-04
Supplement: pbio.0030008.sg002.pdf [file pbio.0030008.sg002.pdf]

## Figure S2

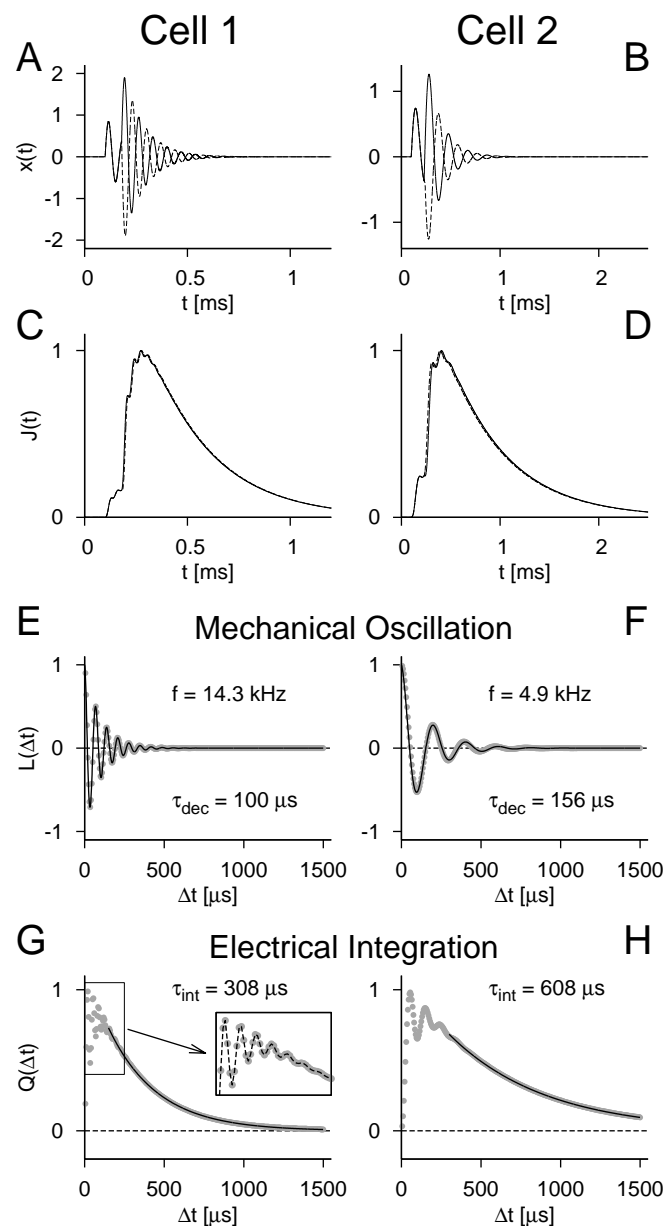

Simulation and analysis of the general cascade model in response to two-click stimuli.

The general cascade model, Eq. (2) in the main text, was used with filters modeled as

$$l(t) = \sin(2\pi ft) \exp(-t/\tau_{\text{dec}}) \text{ and } q(t) = \exp(-t/\tau_{\text{int}}).$$

The parameters were taken from the first two cells presented in detail in the main text:  $f = 14.5$  kHz,  $\tau_{\text{dec}} = 100$   $\mu\text{s}$ , and  $\tau_{\text{int}} = 300$   $\mu\text{s}$  for Cell 1 (left column) and  $f = 5.1$  kHz,  $\tau_{\text{dec}} = 154$   $\mu\text{s}$ , and  $\tau_{\text{int}} = 590$   $\mu\text{s}$  for Cell 2 (right column).

(A,B) Responses of tympanic vibration.  $x(t)$  denotes the signal after application of the linear filter  $l(\tau)$ , arbitrary units, for positive second click (solid line) and negative second click (dashed line).

Inter-click intervals in these two shown examples were  $\Delta t = 80$   $\mu\text{s}$  for Cell 1 and  $\Delta t = 130$   $\mu\text{s}$  for Cell 2.

(C,D) Corresponding responses of  $J(t)$ . The second click was tuned so that the maximum of  $J(t)$  was equal for positive and negative second clicks. This required click amplitudes of size 1.92 and  $-2.49$  relative to the first click for Cell 1 and 2.09 and  $-1.27$  for Cell 2.

(E-H) Filters  $L(\Delta t)$  and  $Q(\Delta t)$  extracted according to Eq. (1) in the main text from tuning the maximum

of  $J(t)$  for many different values of  $\Delta t$  (gray dots). The parameters  $f$ ,  $\tau_{\text{dec}}$ , and  $\tau_{\text{int}}$  indicated in the plots were obtained by fitting a damped harmonic oscillator and an exponential function to  $L(\Delta t)$  and  $Q(\Delta t)$ , respectively (black lines). The initial part of  $Q(\Delta t)$  shows small fluctuations that result from the oscillatory influx of charge following the tympanic vibrations. In panel G, a magnified view of the initial section is shown in the inset.
